# Supplementary material
Source: PubMed Central journal article supplement (PMC2713040)
Supplement: NIHMS92971-supplement-1.pdf [file NIHMS92971-supplement-1.pdf]

## **Supplementary Information for**

**HIV-1 and microvesicles from T-cells share a common glycome, arguing for a common origin.**

*Lakshmi Krishnamoorthy<sup>1</sup>, Julian W. Bess, Jr.<sup>2</sup>, Alex B. Preston<sup>1</sup>, Kunio Nagashima<sup>3</sup>  
and Lara K. Mahal<sup>1\*</sup>*

**a**

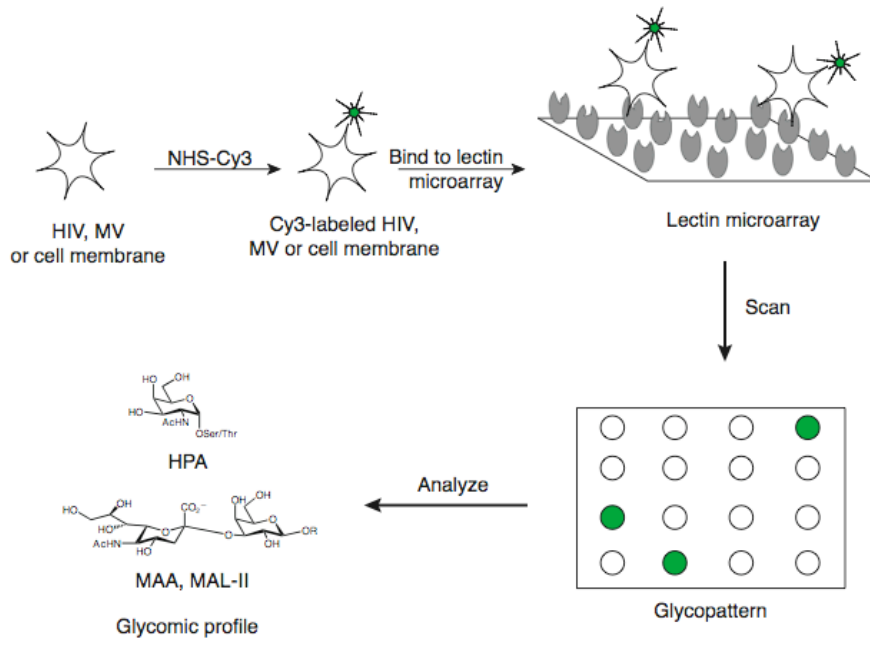

**b**

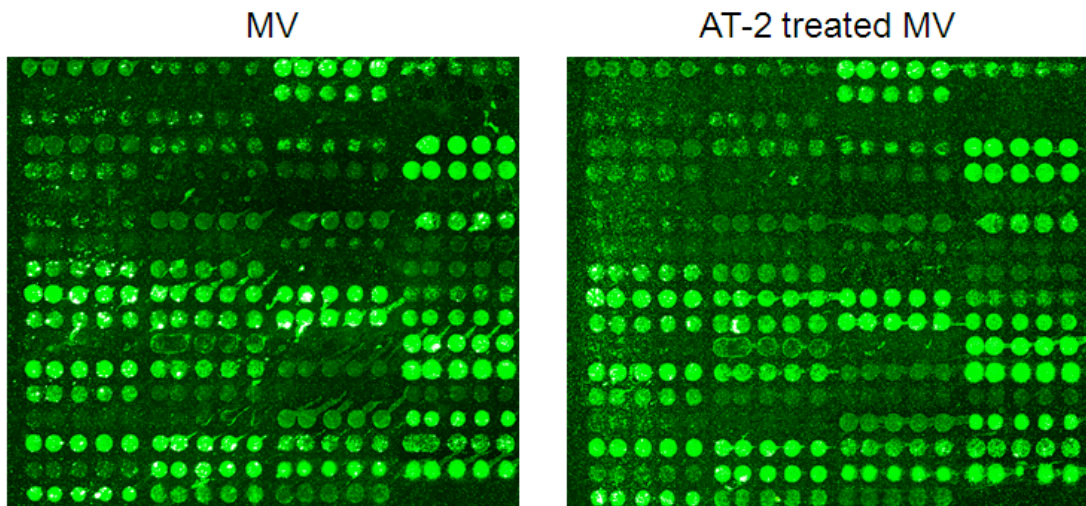

**c**

|           |        |       |        |
|-----------|--------|-------|--------|
| APA       | ABA    | AAA   | PNA    |
| AIA       | BPA    | BDA   | ConA   |
| CCA       | CAA    | CPA   | CA     |
| CSA       | DSA    | DBA   | ECA    |
| EEA       | GNA    | SBA   | GS-I   |
| GS-II     | HMA    | HPA   | IAA    |
| LAA       | LcH    | LFA   | Lotus  |
| LEA       | LPA    | MAA   | NPA    |
| PAA       | LBA    | PHA-E | PHA-L  |
| PSA       | PSL    | PTA   | RPA    |
| SNA       | STA    | SJA   | TKA    |
| RTA       | WGA    | TL    | UEA-I  |
| UEA-II    | UDA    | VGA   | VVA    |
| VVA(man)  | VRA    | VFA   | WFA    |
| Blackbean | RCA    | HHL   | AAL    |
| MAA-I     | MAA-II | PTL-I | PTL-II |
| CVN       | SVN    | GRFT  | Gal-1  |

**d**

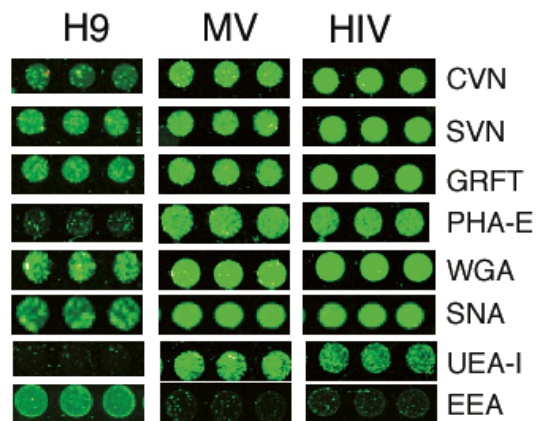

**Supplementary Figure 1. Single color data for H9-derived microvesicles and HIV-1.** (a) Schematic for a single color lectin microarray experiment. (b) Cy-3 labeled AT-2 treated and untreated H9-derived microvesicles (1  $\mu$ g) were compared using the lectin microarray. Samples were from different lots of H9-derived microvesicles. Glycopatterns of the two samples are identical indicating that treatment with AT-2 does not significantly alter glycomic profiles. (c) Lectin print pattern for the arrays shown in **Fig. 1a** in the main text. For each lectin, 5 replicate spots are printed. Note, see **Supplementary Table 1** for the key to lectin abbreviations. (d) Direct comparison of a selected lectin subset from **Fig. 1a** is shown.

**a**

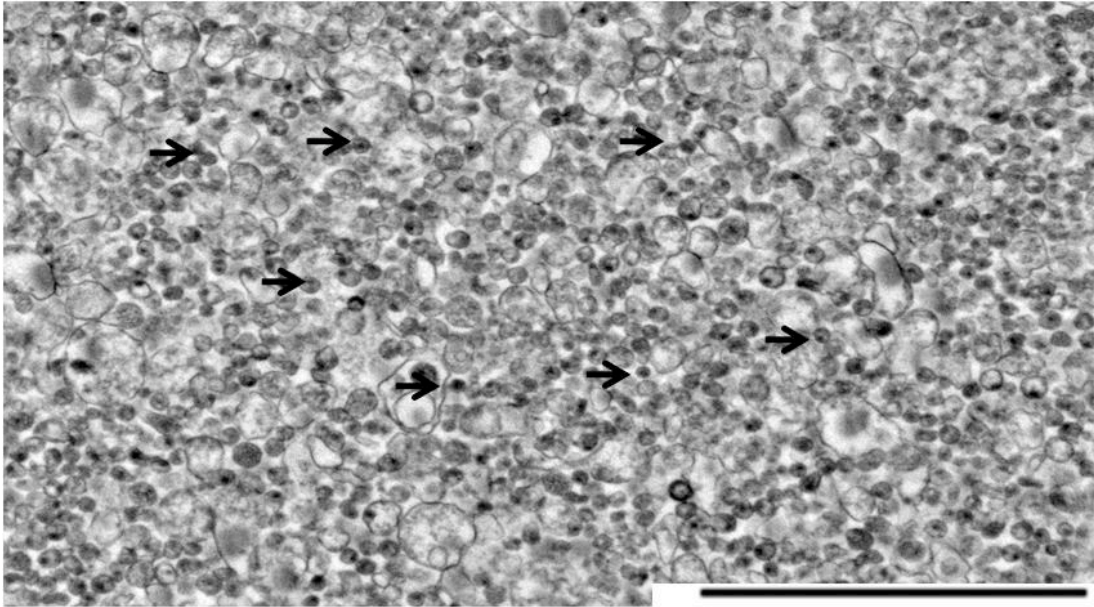

**b**

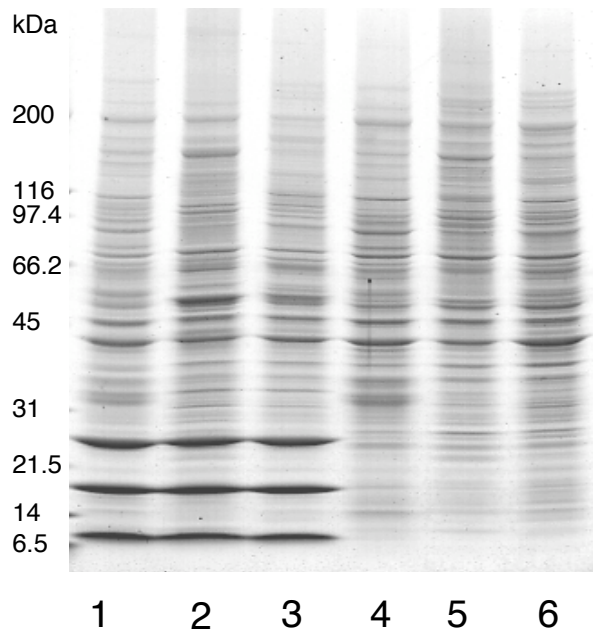

c

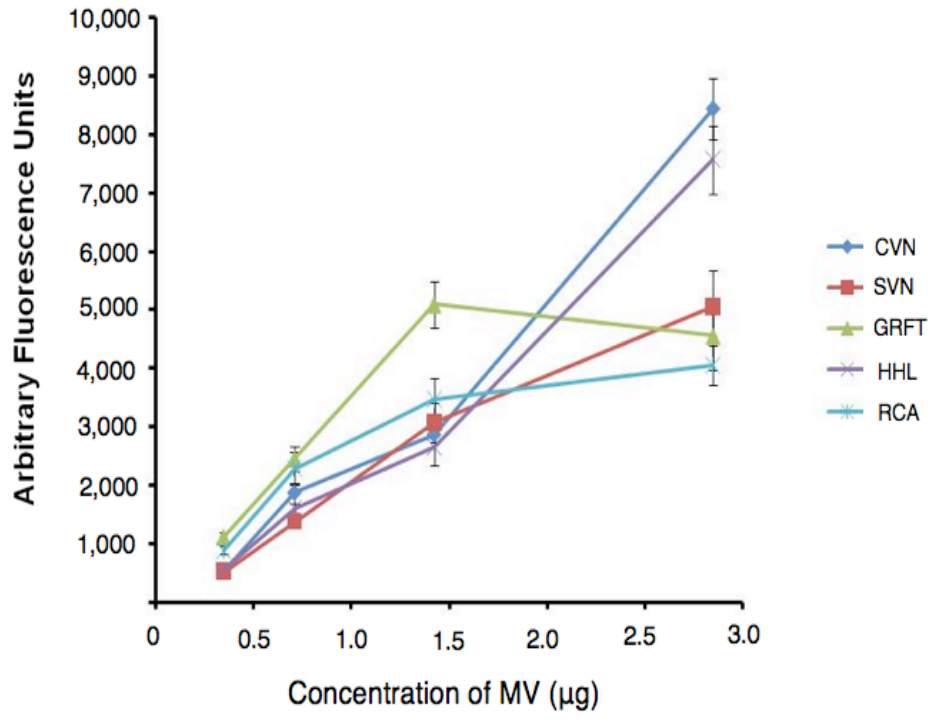

d

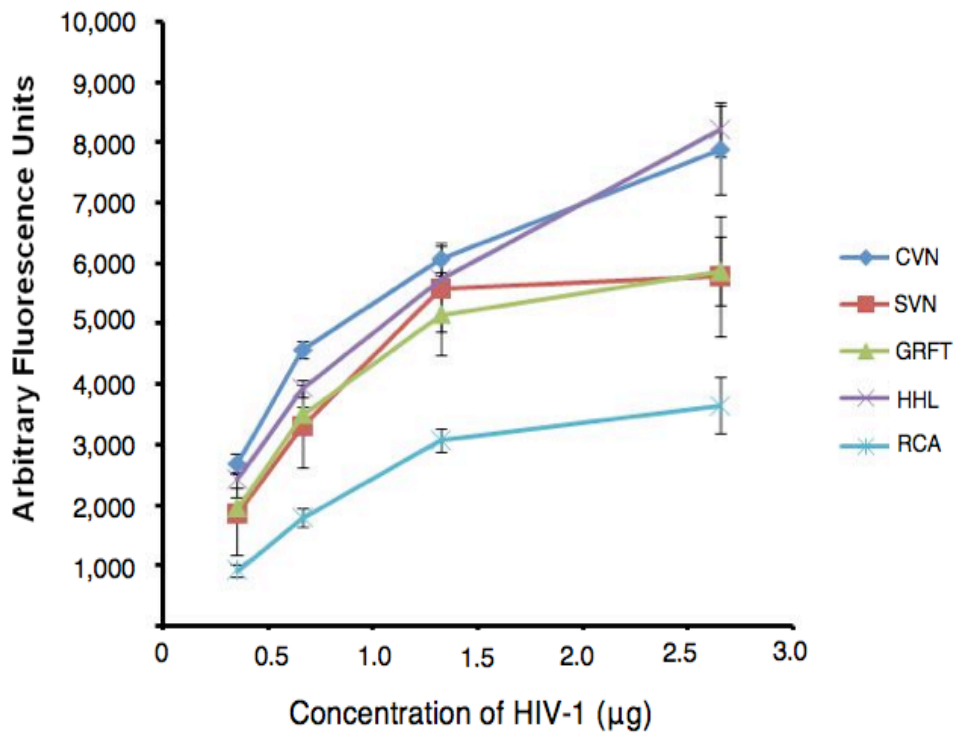

e

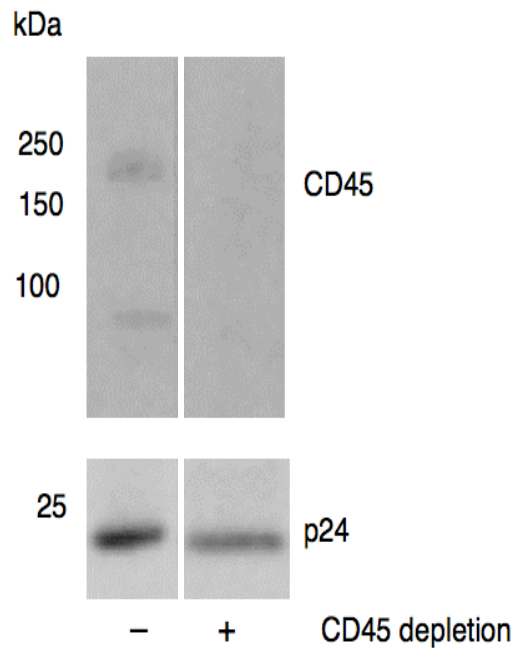

**Supplementary Figure 2. Evidence for the viral purity of H9-derived HIV**

**samples.** (a) Electron microscopic analysis of HIV-1 virions isolated from H9 cells. The scale bar represents 2 microns and arrows identify examples of virions in the preparations. (b) SDS-PAGE analysis of microvesicles and HIV-1 from 3 T-cell lines (H9, SuptT1 and Jurkat-Tat-CCR5). 100  $\mu$ g of protein sample was loaded per lane and the gel was stained with Gelcode blue. The lanes are as follows: 1. HIV-1(MN) CL.4/ H9 2. HIV-1(MN) CL.4/SupT1 3. HIV-1(MN) /Jurkat-Tat-CCR5 4. H9 MV 5. SupT1 MV 6. Jurkat-Tat-CCR5 MV. (c-d) Dose response of labeled MV and HIV samples on the lectin microarray. Lectin microarrays were hybridized with different amounts of Cy3-labeled (c) H9-derived MV or (d) H9-derived HIV. The dose-response curves of select lectins are shown as a function of the average median fluorescence based on 5 spots per array. The bars represent the standard deviation. Given that our arrays are

typically hybridized with  $\sim 1 \mu\text{g}$  of sample per array this data confirms that, for the majority of lectins, our data is in the linear signal range. This data disproves the notion that a 5-fold dilution of glycans would not be observed, as would be the case if MV contamination of HIV-1 were responsible for the signal on our arrays. (e) Western blot analysis confirms the presence of the viral capsid protein (p24) in both CD45 immunodepleted and undepleted HIV samples derived from H9 cells and the absence of CD45.



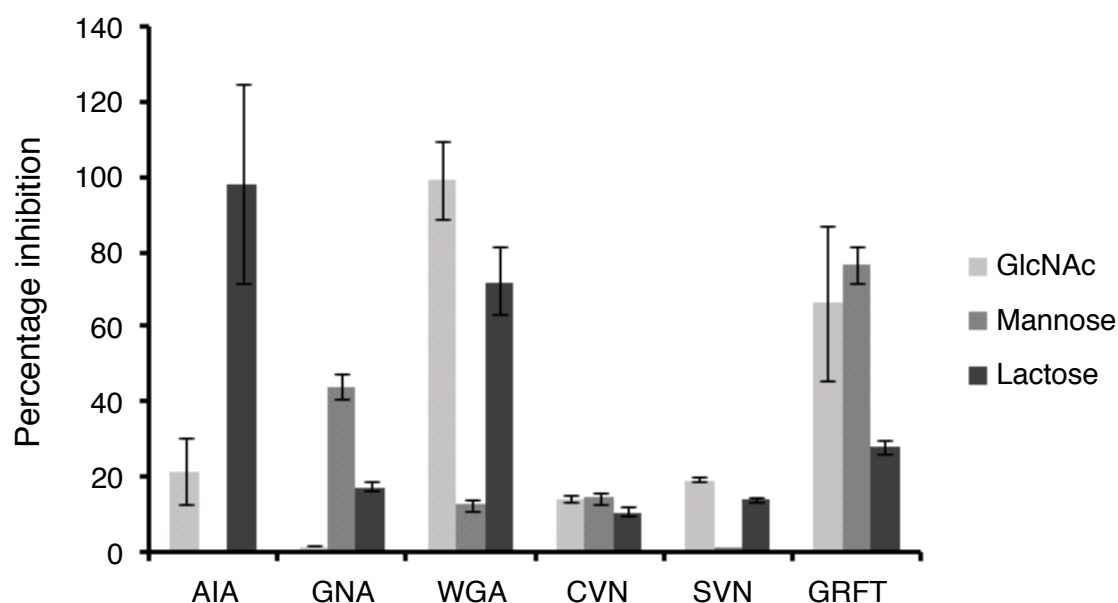

**Supplementary Figure 3. Inhibition with small panel of carbohydrates**

**confirms that the interactions are carbohydrate based.** Lectin microarrays

were preincubated with the appropriate carbohydrates (*N*-

acetylglucosamine, GlcNAc, **5**, light grey; lactose, **4**, medium grey; mannose, **3**,

dark grey) or buffer (control), followed by addition of Cy3-labeled H9-derived

HIV samples. The inhibition profile for a representative subset of lectins is

shown. The graph depicts the % inhibition of each lectin which was calculated

as follows:  $100 * ((\text{Average median fluorescence intensity control} - \text{Average}$

$\text{median fluorescence intensity carbohydrate inhibited array}) / (\text{Average median}$

$\text{fluorescence intensity control}) = \% \text{ inhibition}$ . The errors were propagated using

the standard deviations and standard propagation of error equations. Inhibition

experiments were also performed with both membrane preparations and

microvesicles (data not shown).

**a**

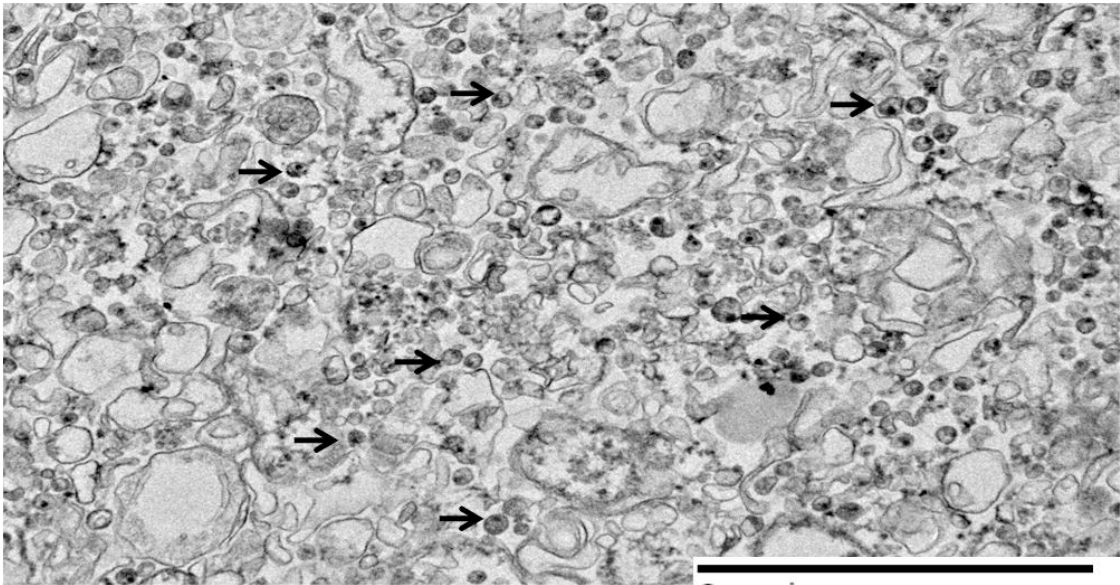

**b**

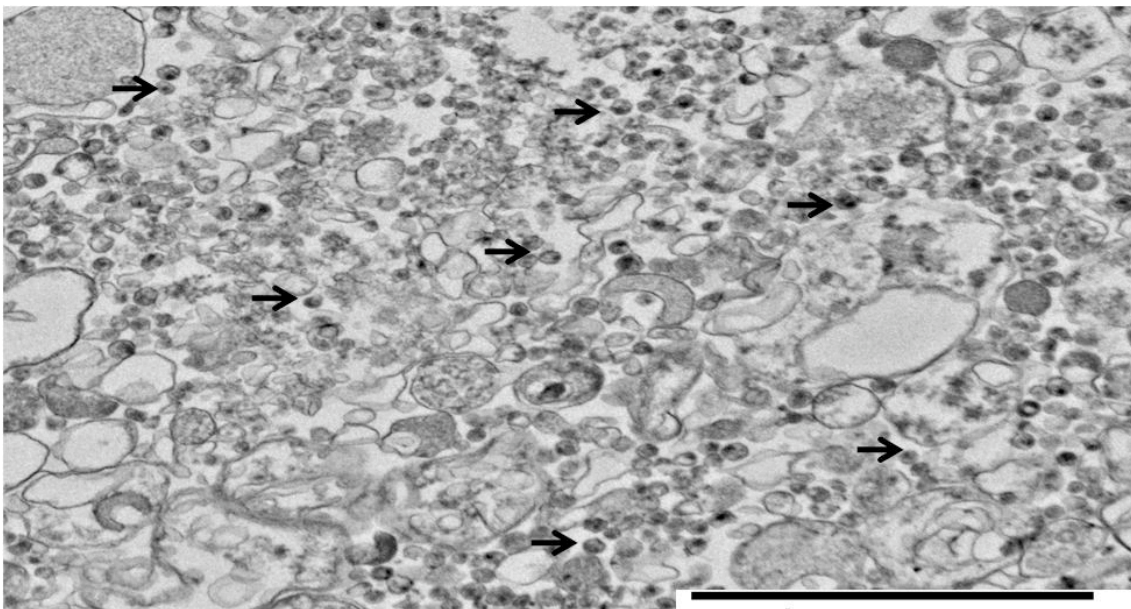

**Supplementary Figure 4. Electron micrographs of representative SupT1 and Jurkat-Tat-CCR5 HIV viral preparations.** Electron microscopic analysis of HIV-1 virions isolated from (a) SupT1 cells and (b) Jurkat-Tat-CCR5 cells. The scale bar represents 2 microns and arrows identify examples of virions in the preparations.

a

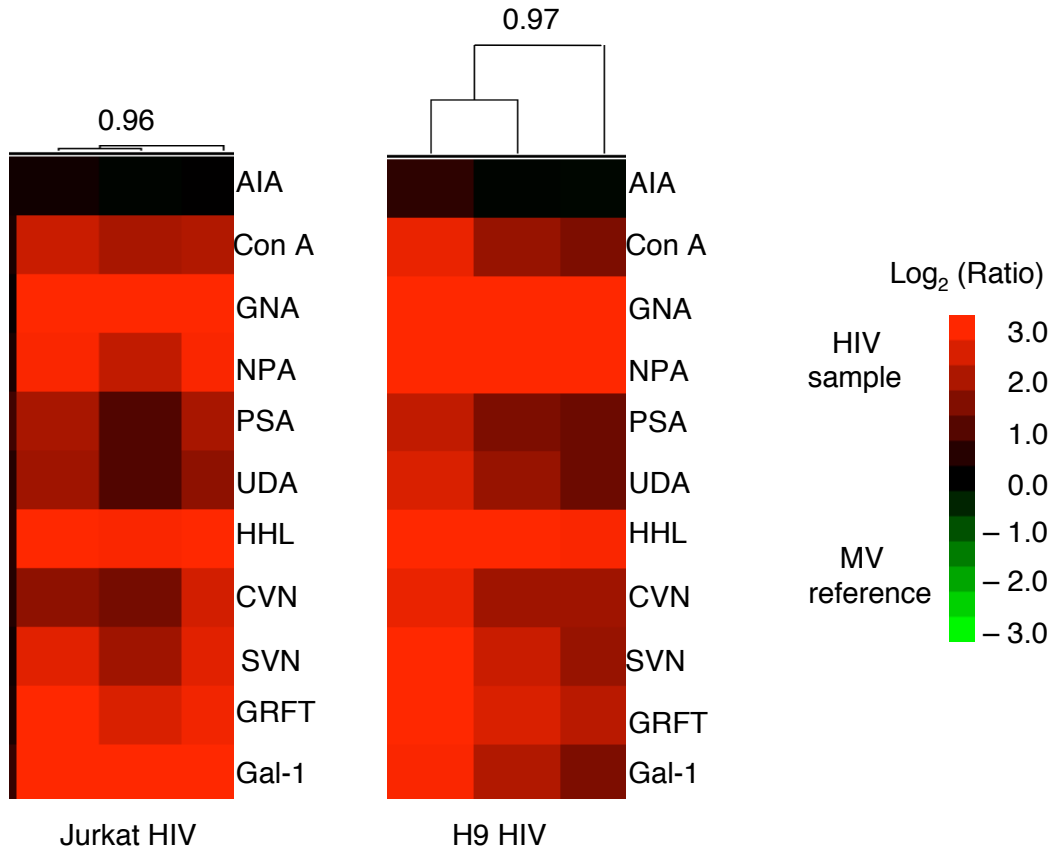

b.

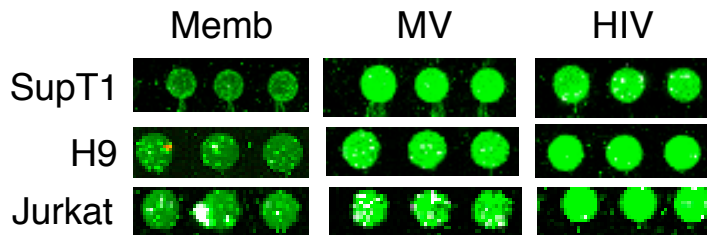

**Supplementary Figure 5. Binding of mannose specific lectins to HIV and microvesicles.** (a) To facilitate direct comparison of HIV and microvesicles, equal amounts of H9- and Jurkat-Tat-CCR5-derived HIV samples (1  $\mu$ g) were hybridized against microvesicles derived from their respective uninfected cells

(1  $\mu\text{g}$ , biological reference), with two arrays (dye-swapped pair) run for each sample to generate Yang correlations as before. The hierarchical cluster map of a select group of mannose-binding lectins is shown. AIA, which binds *N*-acetyl galactosamine residues, is shown as a control. Red indicates enhanced binding to the sample while green indicates enhanced binding to the microvesicles. HIV clearly shows 4-8-fold better binding to mannose lectins than the matched microvesicles in both cell lines. **(b)** MV and HIV derived from all three T-cell lines show increased affinity to the high mannose binding lectin cyanovirin (CVN) when compared to their respective cell membrane samples. This is representative of the relative binding to lectins recognizing high mannose in our panel and illustrates that although mannose-binding lectins bind more strongly to HIV, they still have strong binding to the microvesicles as well.

**a**

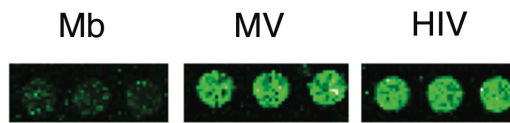

**b**

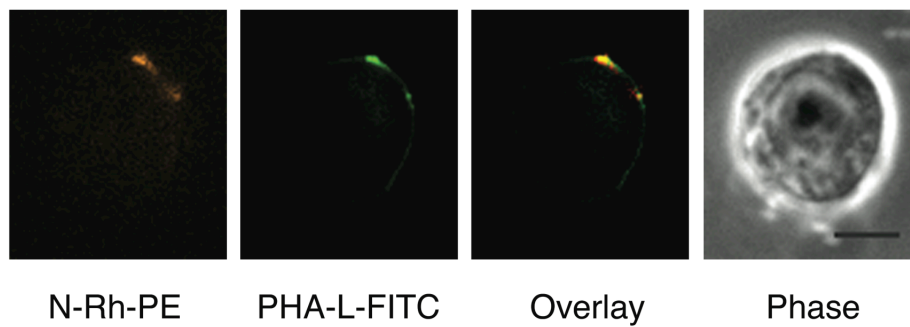

**c**

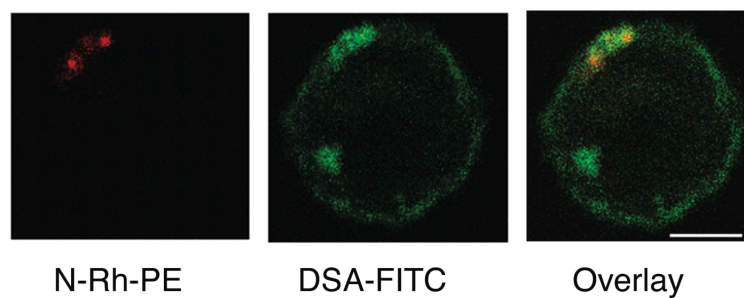

**Supplementary Figure 6. Glycan epitopes enriched in microvesicles and**

**HIV-1 localize to specific domains of the plasma membrane. N-Rh-PE**

enriched domains co-localize with select FITC-labeled lectins on Jurkat-Tat-

CCR5 (Jurkat) cell surfaces. (a) MV and HIV-1 from Jurkat cells exhibit

increased binding to PHA-L in comparison to the Jurkat cell membrane (Mb).

(b) Jurkat cells were labelled with N-Rh-PE, fixed, stained with FITC-PHA-L and

examined using fluorescence microscopy. N-Rh-PE domains (red) colocalize with domains that are enriched in glycans recognized by PHA-L (green). (c) Cells stained with FITC-DSA and N-Rh-PE were examined using confocal microscopy. As expected, cell surface domains enriched in N-Rh-PE staining (red) colocalized with FITC-DSA (green). A representative image is shown. Colocalization was observed at the cell surface throughout the z-axis image planes.

**a**

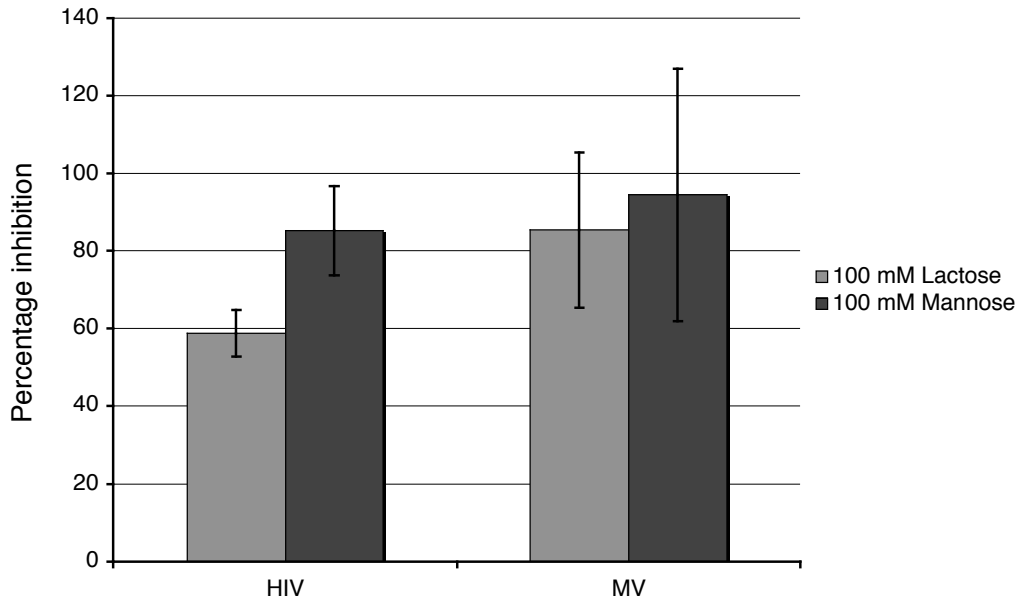

**b.**

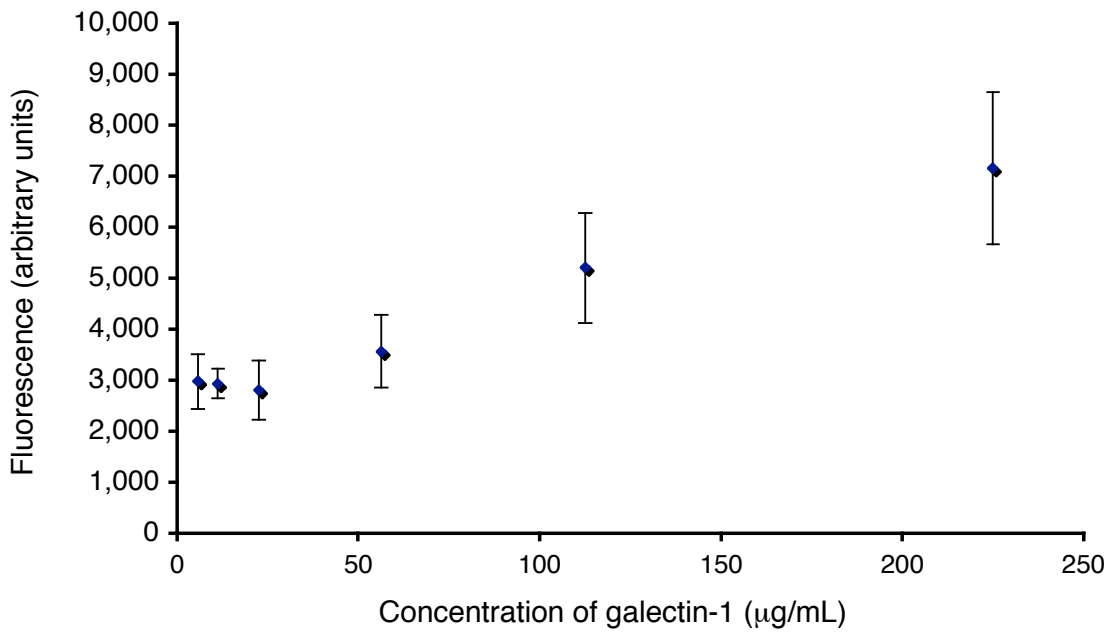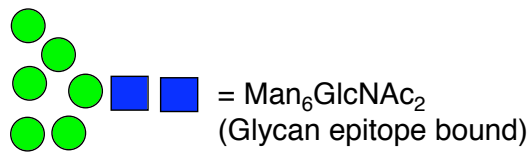

**Supplementary Figure 7. Lactose inhibition of microvesicles and examination of the Consortium for Functional Glycomics data for galectin-**

1. a) In contrast to mannose, which causes >85% inhibition of galectin-1 binding to both H9-derived MV and HIV-1, lactose inhibits HIV-1/galectin-1 interactions only 59%, but inhibits the MV signal 85%. This data shows that galectin-1 is active on the array and displays lactose dependent binding as previously reported<sup>1</sup>. However, the inability of lactose to inhibit galectin-1 binding to HIV-1 argues that interactions with the virus may be through a different binding motif, most likely clustered high mannose. Lectin microarrays were preincubated with 200 mM of the appropriate carbohydrate (lactose, medium grey or mannose, dark grey) for 30 min, followed by addition of Cy3-labeled H9-derived HIV or MV samples. The graph depicts the % inhibition of each lectin, which was calculated as shown in Supplementary Fig. 5. Errors were propagated using the standard deviations and standard propagation of error equations. b) Using publicly available data on galectin-1 binding to carbohydrate microarrays from the Consortium for Functional Glycomics, which has been utilized in a publication<sup>1</sup>, we graphed the dose-dependent binding of galectin-1 to a high mannose epitope present on their carbohydrate microarray (Glycan 197, Man<sub>6</sub>GlcNAc<sub>2</sub>). The average fluorescence without the minimum and maximum spots is shown vs. the concentration of galectin-1 (μg/mL). The error bars represent the standard deviation. This epitope was seen to improve as a relative binder as the concentration of galectin-1 decreased. Despite the presence of other high mannose epitopes on the array, this ligand was the only high mannose ligand that presented a consistent positive signal in this set of assays. However, at some concentrations, this ligand bound galectin-1 with a signal comparable to or higher than LacNAc epitopes (Glycans 152 and 153,



data not shown). This implies that some high mannose epitopes may indeed be ligands for galectin-1.

**Supplementary Table 1. Lectin panel for microarray.<sup>‡</sup>**

| Lectin                                    | Abbreviation | [Print]<br>( $\mu\text{g/mL}$ ) | Print<br>Sugar | Rough Specificity*                                                                  |
|-------------------------------------------|--------------|---------------------------------|----------------|-------------------------------------------------------------------------------------|
| <i>Abrus precatorius</i>                  | APA          | 500                             | Gal            | Gal $\beta$ -1,3GalNAc (TF antigen) > Gal,                                          |
| <i>Agaricus bisporus</i>                  | ABA          | 500                             | Gal            | Gal $\beta$ -1-3GalNAc                                                              |
| <i>Aleuria aurantia</i>                   | AAL          | 1000                            | Fuc            | Fuc                                                                                 |
| <i>Anguilla anguilla</i>                  | AAA          | 1000                            | Fuc            | $\alpha$ -Fuc                                                                       |
| <i>Arachis hyogaea</i>                    | PNA          | 500                             | Gal            | Terminal Gal $\beta$ -OR                                                            |
| <i>Artocarpus intergrifolia (Jacalin)</i> | AIA          | 500                             | Gal            | $\alpha$ -GalNAc not substituted at C-6 (i.e. core 1, 3, T-antigen but not core 2). |
| <i>Bauhinia purpurea</i>                  | BPA          | 500                             | Gal            | Primarily Gal $\beta$ -1,3 or 1,4 but will also bind $\beta$ -GalNAc more weakly    |
| <i>Black bean crude</i>                   | Blackbean    | 1000                            | Lac            | GalNAc                                                                              |
| <i>Bryonia dioica</i>                     | BDA          | 500                             | Gal            | GalNAc                                                                              |
| <i>Canavalia ensiformis</i>               | Con A        | 500                             | Man            | branched and terminal mannose, terminal GlcNAc                                      |
| <i>Cancer antennarius</i>                 | CCA          | 500                             | Lac            | 9-O-Acetyl Sia and 4-O-Acetyl Sia                                                   |
| <i>Caragana arborescens</i>               | CAA          | 500                             | Gal            | GalNAc/Gal (monosaccharides best)                                                   |
| <i>Cicer arietinum</i>                    | CPA          | 1000                            | Lac            | Complex                                                                             |
| <i>Colchicum autumnale</i>                | CA           | 500                             | Gal            | Terminal Gal $\beta$ -OR                                                            |
| <i>Cystisus scoparius</i>                 | CSA          | 500                             | Gal            | $\beta$ -GalNAc, terminal                                                           |
| Cyanovirin                                | CVN          | 500                             | Man            | $\alpha$ -1,2 mannose                                                               |
| <i>Datura stramonium</i>                  | DSA          | 500                             | Lac            | GlcNAc $\beta$ -1,4GlcNAc oligomers and LacNAc                                      |
| <i>Dolichos biflorus</i>                  | DBA          | 500                             | Gal            | GalNAc $\alpha$ -OR                                                                 |
| <i>Erythrina cristagalli</i>              | ECA          | 1000                            | Gal            | LacNAc and GalNAc                                                                   |
| <i>Euonymus eurpaeus</i>                  | EEA          | 1000                            | Lac            | Blood Groups B and H                                                                |
| <i>Galanthus nivalis</i>                  | GNA          | 500                             | Man            | terminal $\alpha$ -1,3 mannose                                                      |
| Galectin-1                                | Gal-1        | 2500                            | Lac            | LacNAc                                                                              |
| <i>Glycine max</i>                        | SBA          | 500                             | Gal            | terminal GalNAc                                                                     |
| Griffithsin                               | GRFT         | 1000                            | GlcNAc         | Mannose, GlcNAc                                                                     |
| <i>Griffonia simplicifolia I</i>          | GS-I         | 500                             | Gal            | $\alpha$ -galactose                                                                 |
| <i>Griffonia simplicifolia II</i>         | GS-II        | 500                             | GlcNAc         | terminal GlcNAc                                                                     |
| <i>Helix pomatia</i>                      | HPA          | 500                             | Gal            | $\alpha$ -GalNAc terminal                                                           |
| <i>Hippeastrum Hybrid</i>                 | HHL          | 1000                            | Man            | $\alpha$ -1,3 mannose and $\alpha$ -1,6 mannose                                     |
| <i>Homaris americanus</i>                 | HMA          | 500                             | Lac            | sialic acid                                                                         |
| <i>Iberis Amara</i>                       | IAA          | 500                             | Lac            | GalNAc                                                                              |
| <i>Laburnum alpinum</i>                   | LAA          | 500                             | GlcNAc         | GlcNAc oligomers                                                                    |
| <i>Lens culinaris</i>                     | LcH          | 1000                            | Man            | Complex (Man/GlcNAc core with $\alpha$ -1,6 Fuc)                                    |
| <i>Limax flavus</i>                       | LFA          | 500                             | Lac            | $\alpha$ -Sia                                                                       |

|                                    |           |      |        |                                                                   |
|------------------------------------|-----------|------|--------|-------------------------------------------------------------------|
| <i>Limulus polphemus</i>           | LPA       | 500  | Lac    | $\alpha$ -Sia                                                     |
| <i>Lotus tetragonolobus</i>        | LTL       | 500  | Fuc    | Terminal $\alpha$ -Fuc, Le <sup>x</sup>                           |
| <i>Lypersicon esculentum</i>       | LEA       | 1000 | GlcNAc | $\beta$ -1,4GlcNAc oligomers                                      |
| <i>Maackia amurensis</i>           | MAL-I     | 1000 | Lac    | LacNAc                                                            |
| <i>Maackia amurensis</i>           | MAL-II    | 1000 | Lac    | $\alpha$ -2,3 sialic acid                                         |
| <i>Maackia amurensis</i>           | MAA       | 500  | Lac    | $\alpha$ -2,3 sialic acid                                         |
| <i>Narcissus pseudonarcissus</i>   | NPA       | 1000 | Man    | Terminal and internal Man                                         |
| <i>Persea Americana</i>            | PAA       | 500  | GlcNAc | Unknown                                                           |
| <i>Phaseolus lunatus</i>           | LBA       | 1000 | Gal    | GalNAc $\alpha$ -1,3[Fuca $\alpha$ -1,2]Gal                       |
| <i>Phaseolus vulgaris-L</i>        | PHA-E     | 500  | Lac    | complex                                                           |
| <i>Phaseolus vulgaris-L</i>        | PHA-L     | 500  | Gal    | $\beta$ -1,6 branched trimannosyl core N-linked glycans           |
| <i>Pisum sativum</i>               | PSA       | 1000 | Man    | Man                                                               |
| <i>Polyporus Squamosus</i>         | PSL       | 500  | Lac    | $\alpha$ -2,6 sialic acid                                         |
| <i>Psophocarpus tetragonolobus</i> | PTA       | 500  | Gal    | Gal                                                               |
| <i>Psophocarpus tetragonolobus</i> | PTL-I     | 1000 | Gal    | $\alpha$ -GalNAc                                                  |
| <i>Psophocarpus tetragonolobus</i> | PTL-II    | 1000 | Gal    | $\alpha$ -1,2 fucosylated LacNAc                                  |
| Ricin B chain                      | RCA       | 1000 | Lac    | $\beta$ -Gal/GalNAc                                               |
| <i>Robinia pseudoacacia</i>        | RPA       | 1000 | Lac    | Complex                                                           |
| <i>Sambucus nigra</i>              | SNA       | 500  | Lac    | $\alpha$ -2,6 sialic acid on LacNAc                               |
| Scytovirin                         | SVN       | 500  | Man    | $\alpha$ -1,2 mannose                                             |
| <i>Solanus tuberosum</i>           | STA       | 500  | GlcNAc | GlcNAc oligomers, LacNAc                                          |
| <i>Sophora japonica</i>            | SJA       | 1000 | Gal    | GalNAc                                                            |
| <i>Trichosanthes kirilowii</i>     | TKA       | 500  | Gal    | $\beta$ -Gal, LacNAc but Sia- $\alpha$ -2,3 or 2,6 inhibits best. |
| <i>Trifolium repens</i>            | RTA       | 500  | GlcNAc | 2-deoxy-Glu                                                       |
| <i>Triticum vulgare</i>            | WGA       | 1000 | GlcNAc | $\beta$ -GlcNAc, sialic acid, GalNAc                              |
| <i>Tulipa sp.</i>                  | TL        | 1000 | GlcNAc | GlcNAc                                                            |
| <i>Ulex europaeus I</i>            | UEA-I     | 500  | Fuc    | $\alpha$ -1,2 fucose on LacNAc                                    |
| <i>Ulex europaeus II</i>           | UEA-II    | 500  | GlcNAc | GlcNAc oligomers                                                  |
| <i>Urtica dioica</i>               | UDA       | 500  | GlcNAc | GlcNAc $\beta$ -1,4GlcNAc oligomers and high mannose epitopes     |
| <i>Vicia fava</i>                  | VFA       | 500  | Gal    | Man>Glc>GlcNAc                                                    |
| <i>Vicia graminea</i>              | VGA       | 500  | Gal    | O-linked Gal $\beta$ -1,3GalNAc clusters                          |
| <i>Vicia villosa</i>               | VVA       | 500  | Gal    | GalNAc                                                            |
| <i>Vicia villosa</i>               | VVA (man) | 500  | Gal    | Man                                                               |
| <i>Vigna radiata</i>               | VRA       | 500  | Gal    | $\alpha$ -Gal                                                     |
| <i>Wisteria floribunda</i>         | WFA       | 500  | Gal    | GalNAc                                                            |

‡Abbreviations: Glu (Glucose), Gal (Galactose), GlcNAc (N-acetyl-D-glucosamine), GalNAc (N-acetyl-D-galactosamine), Man (Mannose), Fuc (Fucose), Sia (Sialic Acid), Lac (Lactose), LacNAc (N-acetyl-D-lactosamine), Le<sup>x</sup> (Lewis x antigen).

\*Specificity data was compiled from a variety of sources including the Consortium for Functional Glycomics Carbohydrate Array Analysis (<http://www.functionalglycomics.org/glycomics/publicdata/primaryscreen.jsp>) and the Handbook of Plant Lectins (1998, Wiley and Sons).

**Supplementary Table 2. Cell lines, Microvesicles and HIV-1 used in this study.**

| <b>Agent</b>              | <b>Cell Line Number</b> | <b>Replicate</b> | <b>Product Lot</b> |
|---------------------------|-------------------------|------------------|--------------------|
| H9 MV                     | CLN283                  | 1                | P4075              |
|                           |                         | 2                | P4076              |
|                           |                         | 3                | P4077              |
| HIV-1(MN) CL.4/ H9        | CLN71                   | 1                | P3935              |
|                           |                         | 2                | P3945              |
|                           |                         | 3                | P3944              |
| HIV-1(MN) CL.4/SUPT1      | CLN219                  | 1                | P4095              |
|                           |                         | 2                | P4092              |
|                           |                         | 3                | P4098              |
| SUPT1 MV                  | CLN52                   | 1                | P3772              |
| SIVmac-NC/SUPT1           | CLN130                  | 1                | P3700              |
| SIVmac-CP/SUPT1           | CLN131                  | 1                | P3866              |
| HIV-1(MN)/Jurkat-Tat-CCR5 | CLN284                  | 1                | P4066              |
|                           |                         | 2                | P4067              |
|                           |                         | 3                | P4068              |
| Jurkat-Tat-CCR5 MV        | CLN259                  | 1                | P4058              |
|                           |                         | 2                | P4060              |
|                           |                         | 3                | P4061              |

## Supplementary methods

**Microarray Data Analysis.** For the cluster analysis, only lectins passing our quality control measurement <sup>2</sup>, as determined by glycoprotein standards, that were “positive” for one or more samples were used. “Positive” lectins were determined using single color data for each sample as follows. For each lectin in a sample, the median fluorescence signal intensity of each spot was divided by the local median background to give a signal to noise ratio (S/N). The S/N of the 5 replicate spots per lectin were tested for significant outliers using Grubbs’ outlier test. If a significant outlier was found, it was discarded and the remaining values were averaged. Only lectins where the S/N + 1 standard deviation was greater than or equal to 5 were considered positive.

For dual-color analysis, we tested the background-subtracted median fluorescence signal intensities for each lectin in each channel for significant outliers using Grubbs’ outlier test (n=5 spots). Significant outliers were discarded and the average of these tested values was used to calculate the Yang correlation values <sup>3</sup> using the data from two orthogonally labeled sample sets (i.e. two arrays) for each lectin on the array (Yang correlation =  $((\text{Log}_2(\text{Sample } A_{\text{Cy}3} \div \text{Biological Reference}_{\text{Cy}5}) + \text{Log}_2(\text{Sample } A_{\text{Cy}5} \div \text{Biological Reference}_{\text{Cy}3}) \div 2))$ ). We created the hierarchical clustering maps using Cluster 3.0 with Java Treeview (<http://rana.lbl.gov/EisenSoftware.htm>) <sup>4</sup>. Unless otherwise indicated, the Pearson correlation coefficient was used as the distance metric for the samples with average linkage analysis. P-value calculations (two-tailed) were done using the Student t determination on the

website <http://faculty.vassar.edu/lowry/tabs.html#r> with n-2 for the degrees of freedom.

**CD45 immunodepletion of HIV-1 virions.** Fluorescently labelled H9 derived HIV-1 virions were immunodepleted using anti-CD45-conjugated paramagnetic microbeads (Miltenyi Biotech, Auburn, CA) as previously described <sup>5</sup>.

**Western blot analysis.** Equal amounts of CD45 immunodepleted and non-depleted virus samples were analyzed by SDS-PAGE and transferred to a nitrocellulose membrane. The membrane was blocked for 1 h in block buffer (5% BSA in TBS, 0.1% Tween) and then incubated with either anti-p24 antibody (1:50,000, AIDS Vaccine Research Program, NCI) or anti-CD45 antibody (1:500, Clone 69, BD Transduction Laboratories, San Jose, CA) in blocking buffer for 1 h. The membrane was then washed (6 x with TBST) and incubated with goat-anti-mouse-HRP (1:10,000, BioRad, Hercules, CA) for 1 h. The membrane was then rinsed 6 x with TBST and visualized using chemiluminescent substrate (West Femto substrate, Pierce, Rockford, IL).

**Electron microscopy** <sup>6</sup>. The HIV pellet was prepared for electron microscopy analysis by adding equal volumes of fixative (2% glutaraldehyde in 0.1 M sodium cacodylate) and centrifuged at 60,000 rpm for 6 minutes at 4°C. The supernatant was discarded and the pellet was overlaid with fixative. The sample was further processed as described previously and examined, imaged by Hitachi 7600 microscope operated at 80kV.

**Fluorescence microscopy of PNGase F-treated Jurkat cells.** Jurkat-Tat-CCR5 cells were adhered to poly-Lysine coated glass bottom dishes and fixed as described above. We then treated the fixed cells with 100 U of PNGase F (New England Biolabs, Ipswich, ME) in PBS or PBS alone at 37 °C for 1 h. Cells were washed with PBS (3 × 5 min) and stained with FITC-conjugated DSA. We obtained fluorescence images as described previously.

**Confocal Microscopy.** For confocal microscopy, cells were prepared as previously described. Confocal images were obtained using the Leica confocal system TCS4D with a 63x oil immersion lens (NA 1.4; FITC: ex. 503 nm, em. 552 nm; Rhodamine: ex. 561 nm, em. 624 nm; Core Facility, Institute for Cell and Molecular Biology, University of Texas, Austin, TX).

**Inhibition experiments.** We preincubated our lectin microarrays with either 200 mM (50 mL in PBS) of the appropriate carbohydrate (mannose and lactose) or buffer (control) for 30 min prior to the addition of Cy3-labeled H9-derived HIV samples (1 mg, 50 mL in PBS with 0.1 % Tween) for a final concentration of 100 mM inhibitory sugar. Samples were incubated for 2 h and slides were processed as before.

## *References*

1. Stowell, S. R. et al. Galectins-1, -2 and -3 exhibit differential recognition of sialylated glycans and blood group antigens. *J Biol Chem* (2008).



2. Pilobello, K.T., Slawek, D.E. & Mahal, L.K. A ratiometric lectin microarray approach to analysis of the dynamic mammalian glycome. *Proc. Natl. Acad. Sci. U. S. A.* **104**, 11534-11539 (2007).
3. Yang, Y.H. *et al.* Normalization for cDNA microarray data: a robust composite method addressing single and multiple slide systematic variation. *Nucleic Acids Res.* **30**, e15 (2002).
4. Eisen, M.B., Spellman, P.T., Brown, P.O. & Botstein, D. Cluster analysis and display of genome-wide expression patterns. *Proc. Natl. Acad. Sci. U. S. A.* **95**, 14863-14868 (1998).
5. Trubey, C.M. *et al.* Quantitation of HLA class II protein incorporated into human immunodeficiency type 1 virions purified by anti-CD45 immunoaffinity depletion of microvesicles. *J. Virol.* **77**, 12699-12709 (2003).
6. Mariner, J. M., McMahon, J. B., O'Keefe, B. R., Nagashima, K. & Boyd, M. R. The HIV-inactivating protein, cyanovirin-N, does not block gp120-mediated virus-to-cell binding. *Biochem Biophys Res Commun* **248**, 841-5 (1998).
